# Supplementary material
Source: PubMed Central journal article supplement (PMC7339286)
Supplement: NIHMS1605923-supplement-Supplement.pdf [file NIHMS1605923-supplement-Supplement.pdf]

# Supporting Information

## **Disruption of the CD loop by Enzymatic Cleavage Promotes the Formation of Toxic Transthyretin Oligomers through a Common Transthyretin Misfolding Pathway**

*Anvesh K. R. Dasari<sup>†</sup>, Jenette Arreola<sup>†</sup>, Brian Michael<sup>‡</sup>, Robert G. Griffin<sup>‡</sup>, Jeffery W. Kelly<sup>§</sup>, Kwang Hun Lim<sup>\*†</sup>*

<sup>†</sup> Department of Chemistry, East Carolina University, Greenville, NC 27858, USA. <sup>‡</sup> Department of Chemistry and Francis Bitter Magnet Laboratory, Massachusetts Institute of Technology, Cambridge, MA, 02139, USA. <sup>§</sup> Department of Molecular and Experimental Medicine and the Skaggs Institute for Chemical Biology, The Scripps Research Institute, La Jolla, CA 92037, USA.

E-mail: [limk@ecu.edu](mailto:limk@ecu.edu)

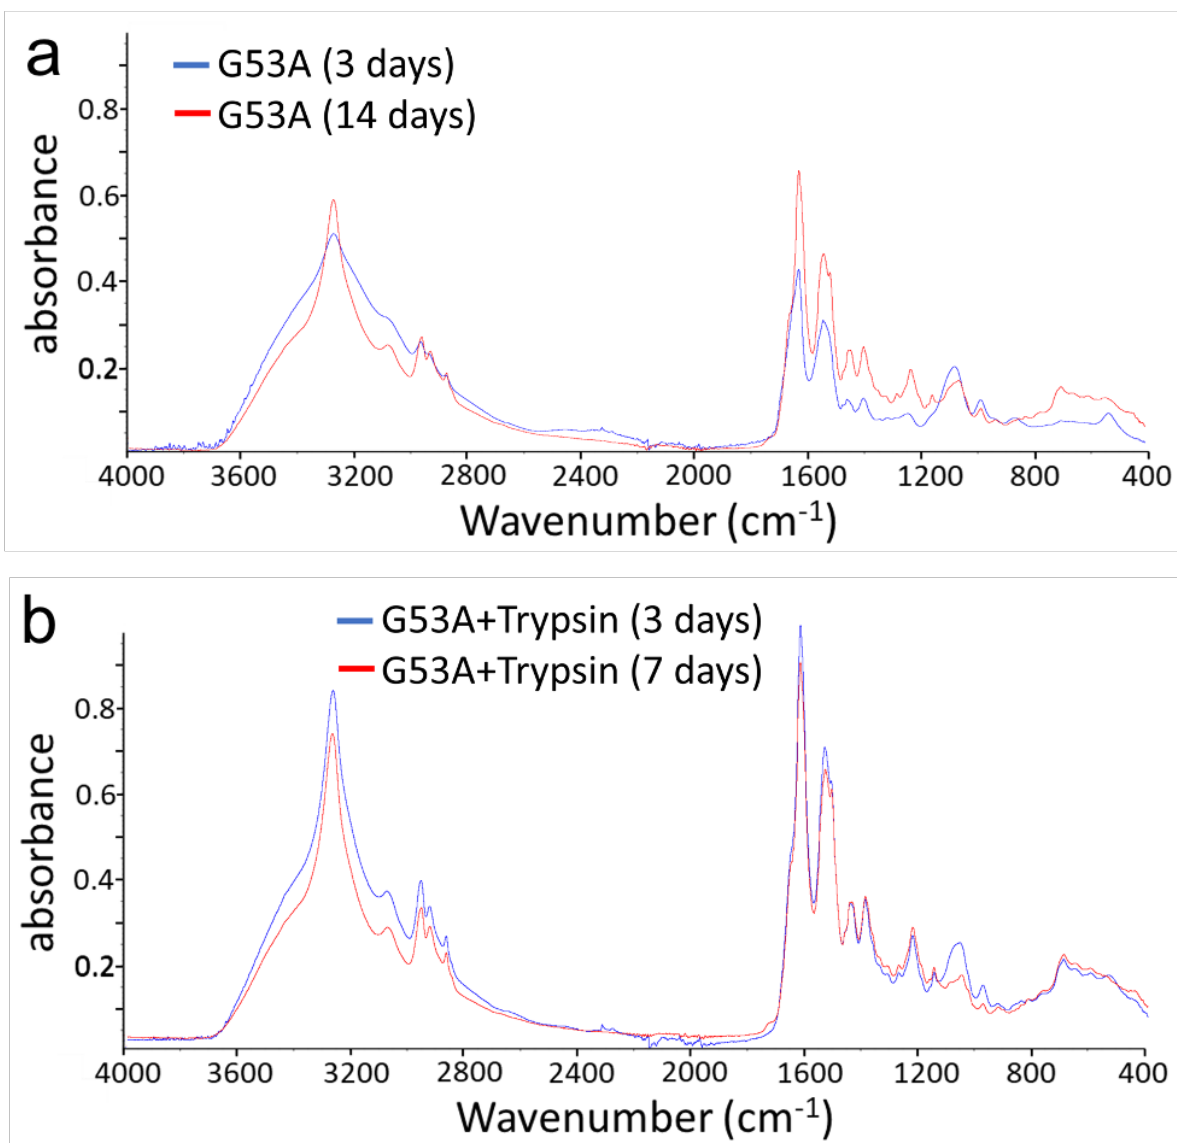

**Figure S1.** FT-IR spectra of the TTR aggregates formed at different incubation times in the absence (a) and presence (b) of trypsin. Approximately, 6 and 12  $\mu\text{g}$  of the aggregates were used for the FT-IR spectra in (a) and (b), respectively.

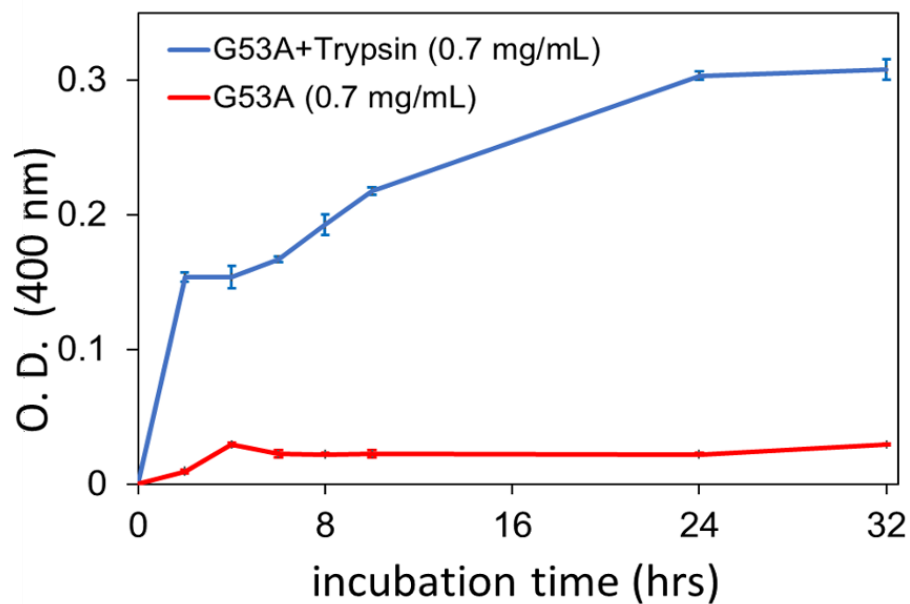

**Figure S2.** Aggregation kinetics of G53A TTR (0.7 mg/ml) in the presence and absence of trypsin. A ratio by weight of 200:1 protein to enzyme was used. Optical density (O. D.) was measured at 400 nm for turbidity of the samples.

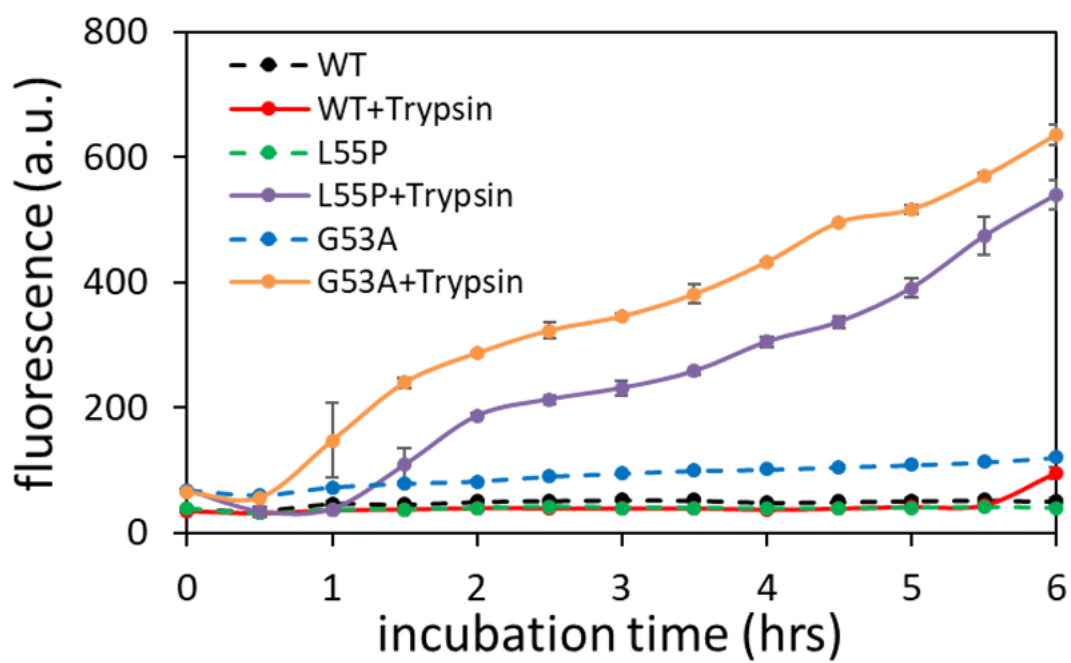

**Figure S3.** Aggregation kinetics of WT, G53A and L55P TTR (0.3 mg/ml) in the presence and absence of trypsin. A ratio by weight of 200:1 protein to enzyme was used. ThT fluorescence emission was monitored every 30 min at 482 nm with excitation of 440 nm

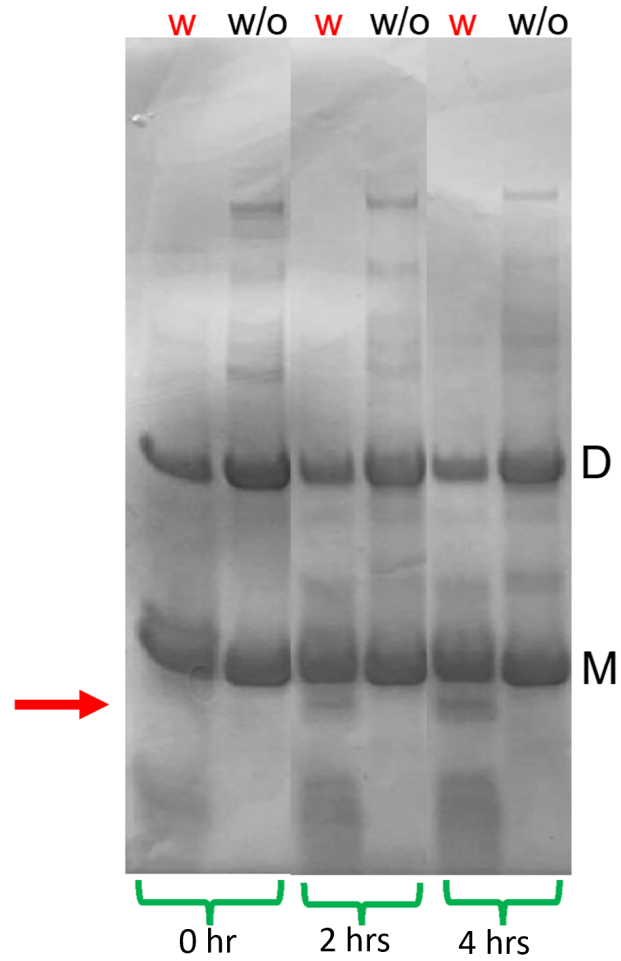

**Figure S4.** SDS-PAGE of the G53A TTR (0.3 mg/ml) in the presence (w) and absence (w/o) of trypsin incubated at different times (0 hr, 2 hrs, and 4 hrs). The red arrow indicates the TTR fragment.

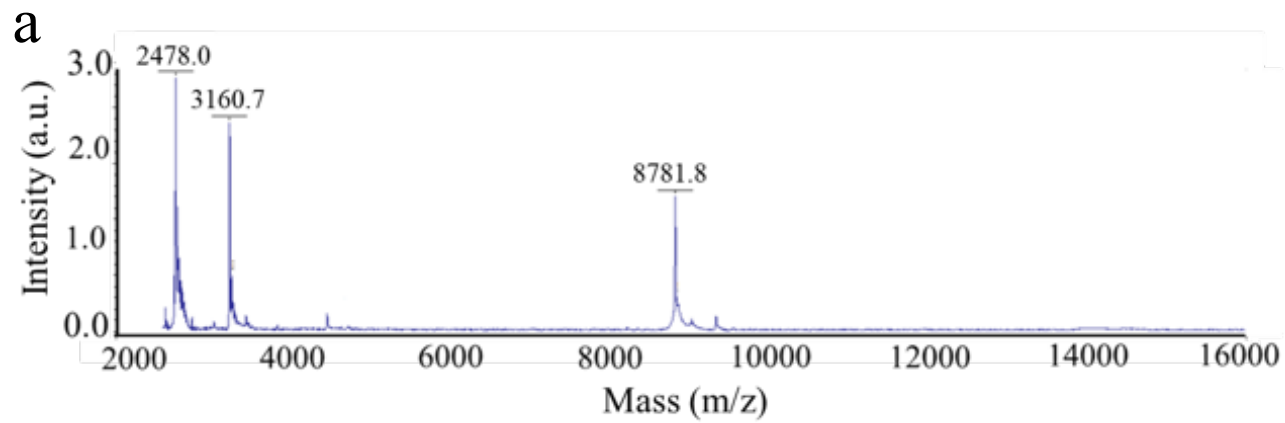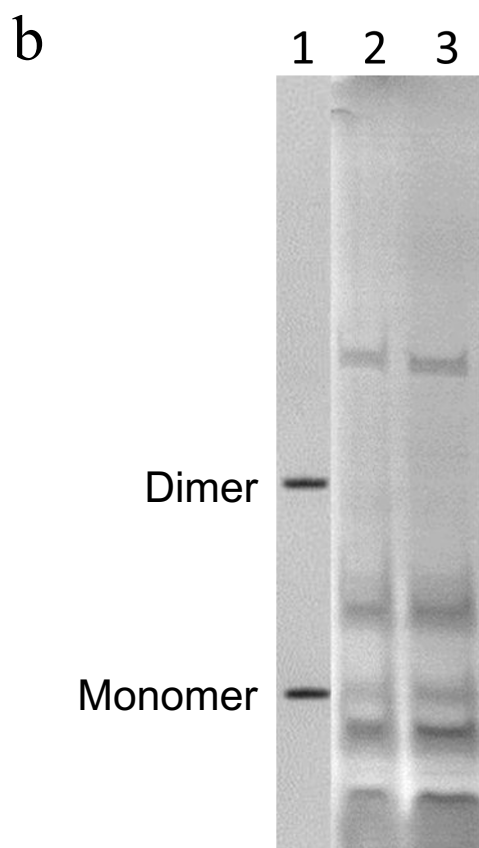

**Figure S5.** (a) MALDI spectrum of the G53A TTR solution (0.3 mg/ml) incubated for 8 hrs in the presence of trypsin. The molecular weight of 8781.8 corresponds to the C-terminal fragment (49 – 127). (b) SDS-PAGE of the G53A TTR precipitates collected after 7 days of incubation: Lane 1: G53A native state, Lane 2: precipitates dissolved with SDS sample buffer, Lane 3: precipitates dissolved with 8M urea.

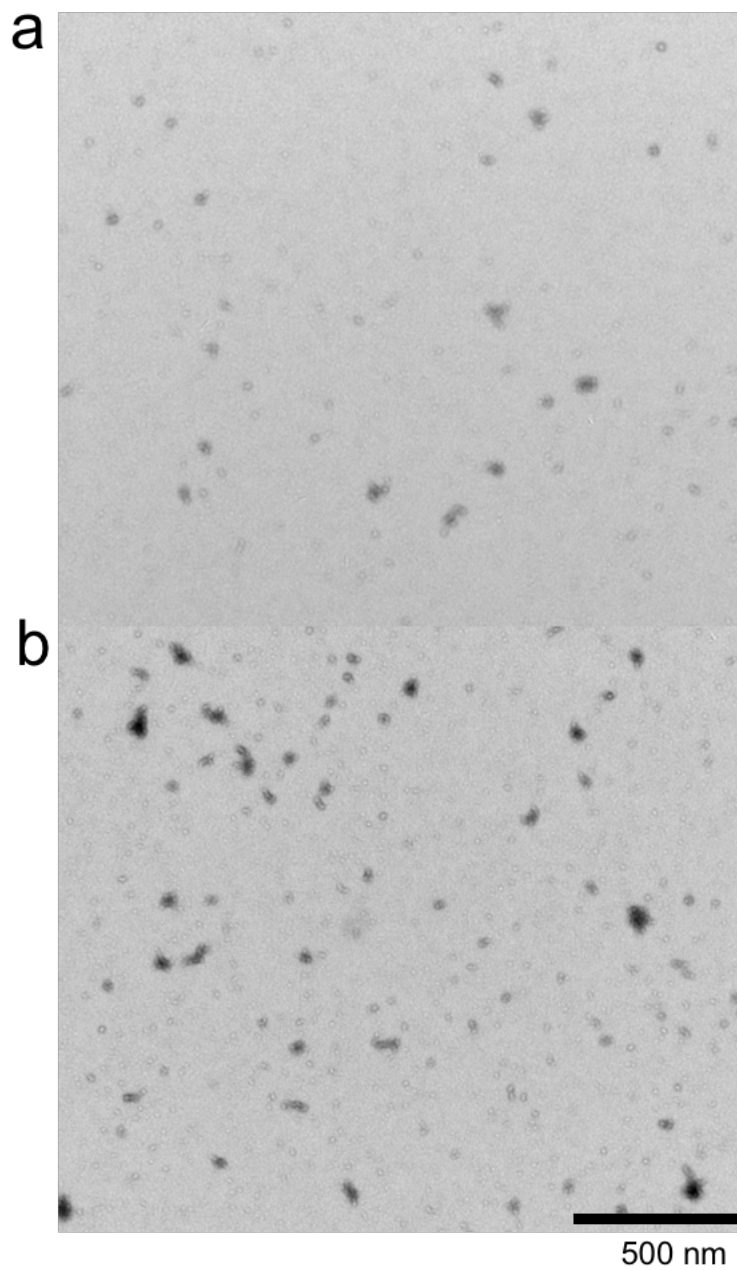

**Figure S6.** TEM images of G53A TTR (0.5 mg/ml) incubated for two hours at 37 °C in the absence (a) and presence (b) of trypsin.

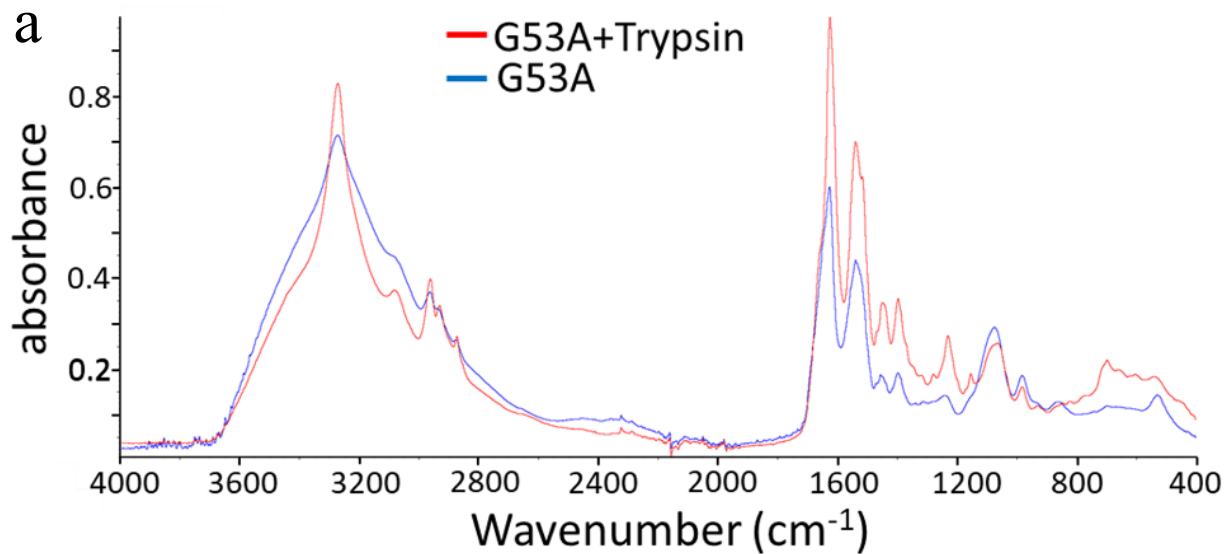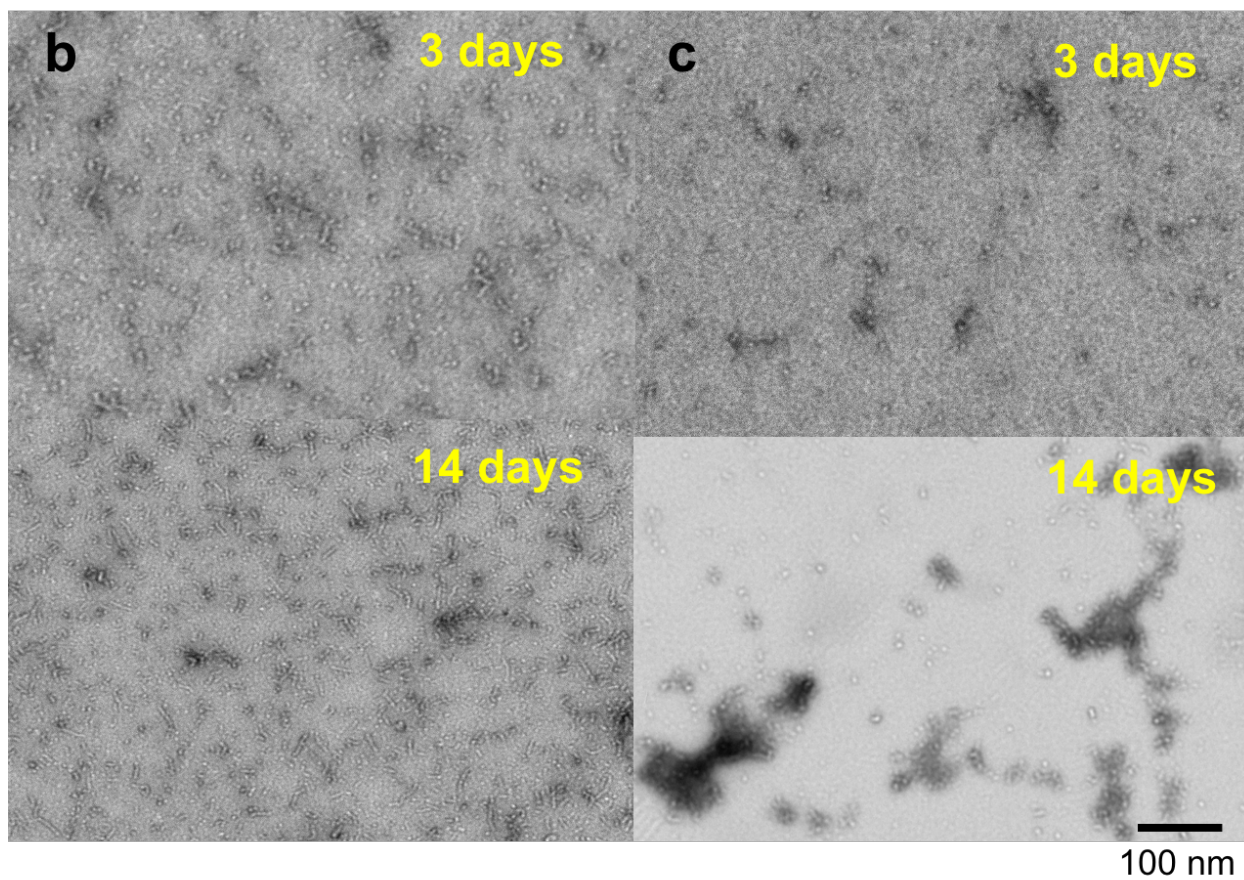

**Figure S7.** (a) FTIR spectra of G53A TTR amyloids obtained in the absence (blue) and presence (red) of trypsin after 3 days of incubation. TEM images of the G53A TTR amyloids formed in the absence (b) and presence (c) of trypsin. The protein precipitates were collected by centrifugation after 3 and 14 days of incubation.



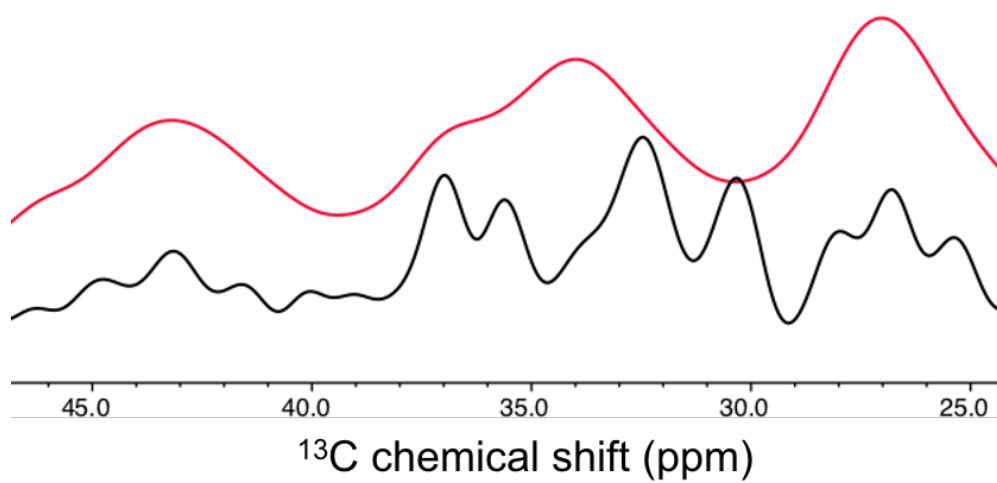

**Figure S8.** One-dimensional slices along 55 ppm in the 2D DARR spectra for the G53A TTR oligomers obtained in the presence (black) and absence (red) of trypsin.

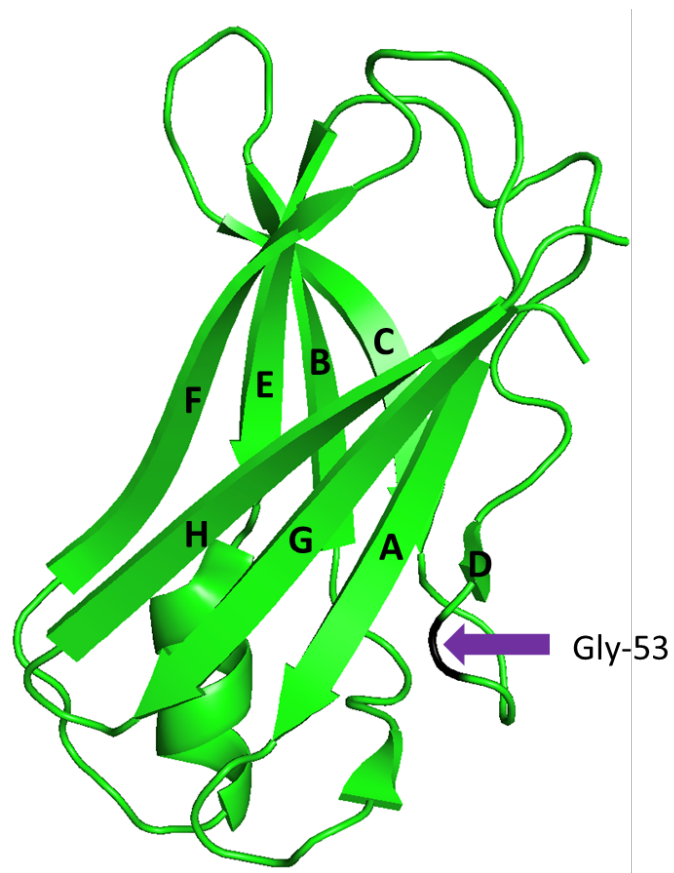

**Figure S9.** Crystal structure (PDB: 1F41) of monomeric subunit in WT TTR. The arrow above indicates the tight turn on G53 residue in the CD loop.

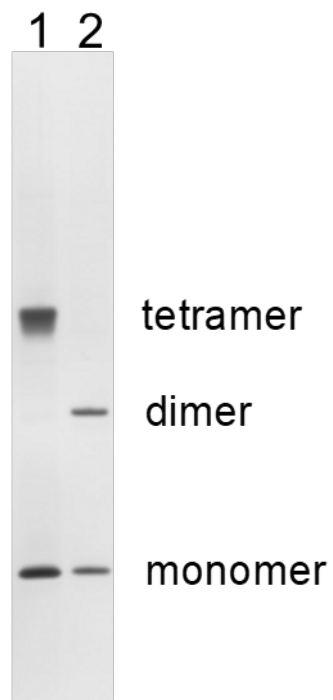

**Figure S10.** SDS-PAGE of purified WT TTR (lane 1) and G53A TTR (lane 2).
